# Supplementary material for: Oxygen diffusion in amorphous and partially crystalline gallium oxide
Source: Royal Society of Chemistry journal article supplement (doi:10.1039/c8cp06439c), 2018-12-20
Supplement: c8cp06439c1.pdf [file c8cp06439c1.pdf]

## Oxygen diffusion in amorphous and partially crystalline gallium oxide

Alexandra von der Heiden,<sup>\*a</sup> Manuel Bornhöfft<sup>b</sup>, Joachim Mayer<sup>b</sup> and Manfred Martin<sup>a</sup>

<sup>a</sup> Institute of Physical Chemistry, RWTH Aachen University, Landoltweg 2, 52074 Aachen, Germany

<sup>b</sup> Central Facility for Electron Microscopy, RWTH Aachen University, Ahornstraße 55, 52074 Aachen, Germany

### Electronic Supplementary Information:

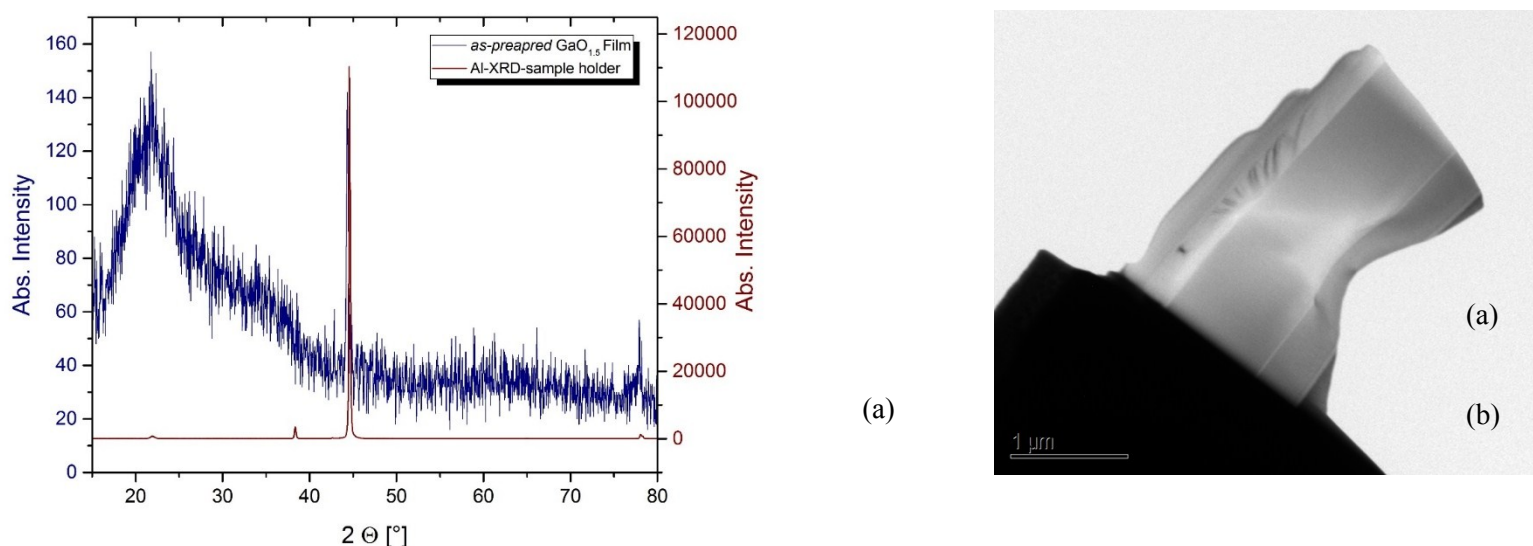

Figure 1 (a) Diffractogram of an amorphous, stoichiometric gallium oxide (a-GaO<sub>1.5</sub>) thin films (blue) as well as the XRD sample holder made of aluminium (red). (b) Overview of a TEM image of a FIB-lamella of an as-prepared a-GaO<sub>1.5</sub> thin film.

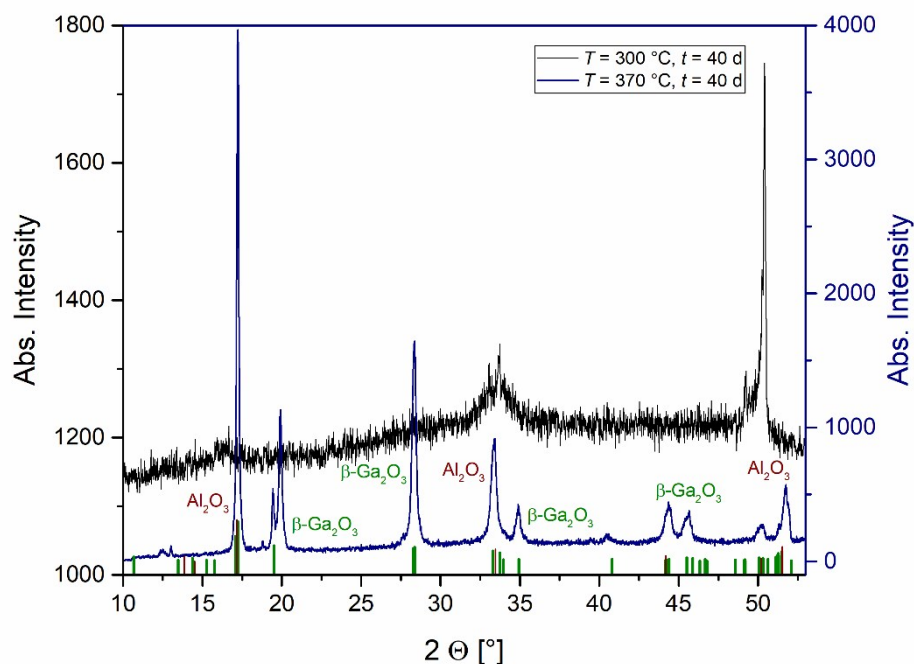

Figure 2 Comparison of diffractograms of a-GaO<sub>1.5</sub> thin films after annealing at  $T = 300$  °C and  $T = 370$  °C for  $t = 40$  d. The red symbols represent the aluminium substrate and the green symbols represent β-Ga<sub>2</sub>O<sub>3</sub>.<sup>23</sup>
